1 **Influence of physical activity and sleep duration on the retinal and choroidal**  
2 **structure in diabetic patients: An SS-OCT study**

3

4 **Running title:** Physical activity, sleep and OCT

5

6 **Authors:**

7 Sen Liu, MBBS<sup>1,2</sup>, Wei Wang, MD, PhD<sup>1\*</sup>, Zihan Qiu, MBBS<sup>3</sup>, Miao He, MD, PhD<sup>3</sup>,

8 Wenyong Huang, MD, PhD<sup>2\*</sup>

9

10 **Affiliation and institute**

11 1. Zhongshan Ophthalmic Center, State Key Laboratory of Ophthalmology, Sun  
12 Yat-Sen University, Guangzhou, People's Republic of China

13 2. School of Medicine, Sun Yat-sen University Guangzhou, China.

14 3. Zhongshan School of Medicine, Sun Yat-sen University Guangzhou, China.

15 4. Department of Ophthalmology, Guangdong General Hospital, Guangdong  
16 Academy of Medical Sciences, Guangzhou, People's Republic of China.

17 \*Co- correspondence authors.

18

19 **Corresponding author:**

20 Wenyong Huang, MD&PhD, Professor of Ophthalmology, Vice director of  
21 Department of Preventive Ophthalmology, Zhongshan Ophthalmic Center, State Key  
22 Laboratory of Ophthalmology, Sun Yat-sen University, 54S.Xianlie Road, Guangzhou,  
23 China 510060, Email: andyhwyz@aliyun.com

24 Wei Wang, MD&PhD, Zhongshan Ophthalmic Center, State Key Laboratory of  
25 Ophthalmology, Sun Yat-sen University, 54S.Xianlie Road, Guangzhou, China  
26 510060, Email: zoc\_wangwei@yahoo.com

27

28 **Word count:** 3022

29 **Tables:** 4

30 **Figures:** 2

31 **ABSTRACT**

32 **Purpose:** To assess the association between physical activity, sleep duration, sitting  
33 time, and alterations of posterior segment structures with swept-source optical  
34 coherence tomography (SS-OCT).

35 **Methods:** Patients with diabetic retinopathy (DR) were recruited, and diabetic  
36 patients without retinopathy (non-DR) who matched for age and duration of diabetes  
37 were used as control. The physical activity, sitting time, and sleep duration were  
38 obtained by using standardized questionnaire. OCT parameters included: retinal nerve  
39 fibre layer (RNFL) thickness, ganglion cell inner plexiform layer (GC-IPL) thickness,  
40 retinal thickness, and choroidal thickness (CT). Linear regression was conducted to  
41 analyse the association.

42 **Results:** Each group included 116 diabetic patients. Average macular CT was  
43 positively correlated with metabolic equivalents (MET) only in the DR group,  
44 independent of age, gender, and other potential confounding factors ( $\beta = 1.163$ ,  $P =$   
45  $0.006$ ). Average macular CT was also positively correlated with sleep duration only in  
46 the non-DR group, independent of age, gender, and other potential confounding  
47 factors ( $\beta = 10.54$ ,  $P = 0.031$ ). No correlation was found between MET, sleep duration,  
48 and other OCT parameters. Sitting time was not significantly correlated with OCT  
49 parameters either.

50 **Conclusions:** Physical activity and sleep duration are both positively correlated with  
51 macular choroidal thickness; this suggests that more time in physical activity and  
52 sleep benefit the retina, while there was no association between sedentary time and  
53 OCT parameters. Further studies are warranted to clarify the underlying mechanisms  
54 and the role of physical activity and sleep in CT alterations and DR.

55

56 **Keywords:** Physical activity, sleep, optical coherence tomography, choroidal  
57 thickness, diabetes mellitus.

58

59 **INTRODUCTION**

60 Diabetes mellitus (DM) and diabetic retinopathy (DR) have become major public  
61 health issues globally. There were 415 million adults with DM across the world in  
62 2015, and the figure will reach 642 million by 2040.[1] Among DM patients, 35%  
63 will develop DR, which is the leading cause of blindness in the working-age  
64 population.[2] Many risk factors have been identified as being associated with DR,  
65 including the glycemia level, duration of DM, smoking, obesity, and hypertension.[2]  
66 Physical activity, sedentary time, and sleep duration have also been implicated in the  
67 development and progression of DR.[3,4] Optical coherence tomography (OCT) has  
68 been widely used for DR patients in clinical practice. The advance of OCT technology  
69 gives us an opportunity to obtain more detailed anatomical information of the  
70 posterior segment, including each layer of the retina and the choroid.[5]

71

72 Identifying related factors for OCT parameters is informative for clinical evaluation of  
73 normal variations and understanding the pathogenesis of DR. Previous studies mainly  
74 focus on the relationship between OCT parameters and traditional risk factors of  
75 diabetes, such as insulin resistance, poor glycaemic control, and renal function.[6-8]  
76 Population-based studies have shown that physical activity is related to retinal  
77 microcirculation, which has long been established as an independent risk factor of  
78 diabetes.[9-11] Emerging evidence suggests that sleep duration and sleep quality may  
79 possibly affect the incidence of diabetes and DR, as well as being associated with  
80 insulin resistance and poor glycaemic control.[12-14] However, little is known about  
81 the relationship of physical activity, sleep, and posterior segment structure, including  
82 the choroid and retina, in diabetic patients.

83

84 Considering the alterations in each layer of the retina and choroid in DM patients, it is  
85 reasonable to hypothesise that physical activity and sleep may also strongly impact  
86 OCT parameters. Therefore, the objective of this study was to investigate the  
87 association between physical activity, sleep, and retinal and choroidal parameters  
88 assessed with the latest swept-source optical coherence tomography (SS-OCT).

89

## 90 **METHODS**

### 91 **Participants**

92 This cross-sectional study was performed at Zhongshan Ophthalmic Centre (ZOC),  
93 Sun Yat-sen University, China. The protocol of the study was approved by the  
94 Institute Ethics Committee of ZOC. The study was performed according to the  
95 guidelines of the Helsinki Declaration. All participants signed written informed  
96 consent before entering. Subjects aged 35 or more who had type 2 diabetes with  
97 treatment-naïve eyes were recruited. The patients of DR were considered as case  
98 group (DR group), and the patients without DR were set as control group (NDR  
99 group). The diabetic patients with and without DR were matched for age and duration  
100 of DM. Exclusion criteria were as follows: (1) history of serious systemic diseases  
101 other than diabetes, such as serious cardiovascular and cerebrovascular diseases,  
102 malignant tumour, renal diseases, and chronic obstructive pulmonary disease; (2)  
103 history of surgery, such as thrombolysis therapy or kidney transplantation; (3)  
104 presence of cognitive impairment, mental illness, or inability to complete the  
105 questionnaire and examination; (4) history of glaucoma, age-related macular  
106 degeneration, vitreous-macular diseases other than DR, or amblyopia; (5) history of  
107 ocular surgical interventions, such as retina laser or intraocular injection, glaucoma  
108 surgery, cataract surgery, or laser myopia surgery; and (6) abnormal refractive media  
109 (moderate to severe cataract, corneal ulcer, pterygium, or corneal turbidity), poor  
110 fixation, and other causes resulting in poor quality of fundus or OCT images.

111

### 112 **Systemic and laboratory parameters**

113 General information, including age, sex, duration of diabetes, other systemic chronic  
114 diseases, and risk factors, was collected via questionnaires. Height, weight, systolic  
115 blood pressure (SBP), and diastolic blood pressure (DBP) were measured by an  
116 experienced nurse. Mean blood pressure (mean BP) =  $1/3$  SBP +  $2/3$  DBP. The serum  
117 creatinine (Scr), haemoglobin A1c (HbA1c), total cholesterol (TC), triglycerides (TG),  
118 serum uric acid, and C-reactive protein were determined in standardized lab.

119

### 120 **Physical activity and sleep duration**

121 The International Physical Activity Questionnaire (IPAQ) was used to assess the  
122 physical activity status of the participants. Metabolic equivalents (MET) were then  
123 calculated according to the principles of the IPAQ to quantify physical activity.[15]  
124 Sitting time, a proxy for sedentary time, was also included in the analysis. We used  
125 the Pittsburgh Sleep Quality Index (PSQI) to assess sleep quality over a 1-month time  
126 interval. The PSQI, a self-reporting questionnaire, is widely used in clinical research  
127 due to its well-established reliability and validity. We used the sleep duration item  
128 mainly for statistical analysis.[16]

129

### 130 **Ocular examination**

131 Comprehensive ocular examinations were conducted for all participants. The anterior  
132 and posterior segments were evaluated by slit-lamp biomicroscopy and  
133 ophthalmoscopy. The evaluations of best corrected visual acuity (BCVA) and  
134 intraocular pressure (IOP) were regularly performed. Ocular biometric parameters  
135 were obtained using optical low-coherence reflectometry (Lenstar LS900; Haag-Streit  
136 AG, Koeniz, Switzerland). Auto refraction was measured by an autorefractor  
137 (KR8800; Topcon, Tokyo, Japan) after pupil dilation.

138

### 139 **SS-OCT imaging**

140 The SS-OCT (DRI OCT-2 Triton; Topcon, Tokyo, Japan) instrument was used to  
141 obtain high-definition retina and choroid images. The macular region was scanned  
142 using a 6\*6 mm volume scan protocol, which presents the thicknesses of each layer of  
143 retina and choroid in 9-ETDRS sectors. Segmentation of different layers on the OCT  
144 images and construction of topographic maps were automatically rendered by the  
145 software program. Segmentation was carefully inspected and confirmed by one OCT  
146 technician who was masked as to the refractive status of the participants, and manual  
147 correction was performed when the software misjudged the borderline of each layer.  
148 The peripapillary region was scanned using a 360 degree, 3.4-mm-diameter circle that

149 was centred on the optic disc. Scans were centred using internal fixation. The macular  
150 region was scanned using a 3.14 circle. Parameters assessed by SS-OCT include  
151 average thickness of the macular retinal nerve fibre layer (mRNFL), GC-IPL  
152 thickness, retinal thickness, macular choroidal thickness (MCT), thickness of the  
153 peripapillary retinal nerve fibre layer (pRNFL), and peripapillary choroidal thickness  
154 (pCT).

155

## 156 **Statistical analyses**

157 We incorporated data of the right eye only into analyses. The Kolmogorov-Smirnov  
158 test was carried out to verify normal distribution. When normality was confirmed, a  
159 t-test was conducted to evaluate inter-group differences of demographic, systemic,  
160 and ocular parameters. The Fisher's exact test was used for categorical variables.  
161 Bivariate scatter plots were made to display the potential factors affecting OCT  
162 parameters. Variables with a P value < 0.10 in univariate analyses were included in  
163 the multivariate analysis. Univariate and multivariate linear regression analyses were  
164 used to assess the associations of MET, sitting time, sleep duration, and OCT  
165 parameters. We conducted crude linear regression in model 1. Potential confounding  
166 factors were then adjusted in multivariate regression analysis, with model 2 adjusting  
167 for age and sex, and model 3 for age, sex, gender, axial length, duration of diabetes,  
168 haemoglobin A1c (HbA1c), mean blood pressure, cholesterol, body mass index (BMI),  
169 intraocular pressure (IOP), best corrected visual acuity (BCVA, logMAR unit), and  
170 OCT imaging time. We also assessed the average MCT stratified by MET tertile in  
171 patients without retinopathy and stratified by different status of sleep duration in  
172 patients with retinopathy, using ANOVA. A P value of < 0.05 was considered  
173 statistically significant. All analyses were performed using Stata Version 14.0 (Stata  
174 Corporation, College Station, TX, USA).

175

## 176 **RESULTS**

### 177 **Demographic and clinical characteristics**

178 A total of 232 participants (116 in each group) who met inclusion/exclusion criteria

179 were included in the final statistical analyses. The demographic and clinical features  
180 of the participants are shown in Table 1. The mean age was  $64.2 \pm 7.2$  years, and  
181 almost half of them were male. The patients with and without DR did not differ in  
182 most demographic and clinical parameters, except for higher systolic blood pressure  
183 in DR patients ( $136.6 \pm 19.5$  mmHg versus  $130.4 \pm 16.0$  mmHg,  $P = 0.009$ ).

184

### 185 **Physical activity, sitting time, and OCT parameters**

186 Figure 1 shows that higher MET was associated with increased choroidal thickness,  
187 with average MCT  $167.9 \pm 9.9$   $\mu\text{m}$  for the first tertile,  $198.3 \pm 10.9$   $\mu\text{m}$  for the second  
188 tertile, and  $214.5 \pm 12.4$   $\mu\text{m}$  for the third tertile ( $P < 0.001$ ). The results of the linear  
189 regression of MET with OCT parameters are summarized in Table 2. There was a  
190 positive correlation of average MCT and MET in the DR group ( $\beta = 1.561$ , 95%  
191 confidence interval (CI): 0.653 to 2.469,  $P = 0.001$ ). In further adjusting of other  
192 factors, MET remains significantly associated with average MCT ( $P = 0.005$  in model  
193 2,  $P = 0.006$  in model 3). None of the other OCT parameters—mRNFL thickness,  
194 GC-IPL thickness, retinal thickness, pRNFL thickness, and pCT—were significantly  
195 related to MET. The MET was not related to any OCT parameters in NDR patients.  
196 Moreover, when we considered sitting time as another parameter to reflect physical  
197 activity, no significant correlations were found between it and all OCT parameters in  
198 both groups (Table 3).

199

### 200 **Sleep duration and OCT parameters**

201 For patients with NDR, average MCT was positively correlated with sleep duration ( $\beta$   
202 = 16.02, 95% CI: 4.76 to 27.28,  $P = 0.006$ ), as shown in Figure 2A. The average MCT  
203 was significantly different among the three subgroups ( $167.2 \pm 20.0$   $\mu\text{m}$  versus  $209.7$   
204  $\pm 9.6$   $\mu\text{m}$  versus  $247.0 \pm 21.3$   $\mu\text{m}$ ,  $P < 0.001$ ). The results of linear regression of sleep  
205 duration and OCT parameters are summarized in Table 4. After adjusting other factors,  
206 sleep duration remains independently correlated with average MCT in NDR patients,  
207 with  $\beta = 11.11$  (95% CI: 0.03 to 22.19,  $P = 0.049$ ) in model 2 and  $\beta = 10.54$  (95% CI:  
208 0.96 to 20.12,  $P = 0.031$ ) in model 3. For OCT parameters in patients with DR, no

209 significant association with sleep duration was noted (All  $P > 0.05$ ).

210

## 211 **DISCUSSION**

212 The present study used SS-OCT to explore the association of physical activity and  
213 sleep duration with posterior segment structure in diabetic patients. The results  
214 suggested a thickened macular choroid in DR patients with more physical activity, but  
215 no association between sitting time and OCT parameters. We also found a positive  
216 correlation between sleep duration and the MCT in individuals without DR. To the  
217 best of our knowledge, this is the first study to correlate the OCT parameters centring  
218 on macula and optic nerve head with physical activity and sleep duration.

219

220 The choroid provides 85% of the blood supply to the eyeball and plays a very  
221 important role in normal retinal and choroidal functions. There are limited data on the  
222 relationship between physical activity and retino-choroidal microcirculation.[17-20]  
223 Our finding of an increased CT being associated with higher physical activity  
224 indirectly affirms the previous finding that a higher level of physical activity lowers  
225 the likelihood of DR due to altering the retinal microvascular function. Keel et al.[21]  
226 reported an inverse correlation between physical activity and retinal venular calibre in  
227 adolescents with type 1 diabetes, while Gopinath et al.[9] reported that higher levels  
228 of physical activity are associated with narrower retinal arterioles. Sayin et al.[22]  
229 reported that short-term dynamic exercise causes a significant increase in CT for at  
230 least 5 min following exercise. However, Hong et al.[23] did not find any changes of  
231 MCT in healthy subjects after 15 min on a treadmill. Alnawaiseh et al.[18]  
232 demonstrated that increased physical activity induced significant changes in optic  
233 nerve and macular perfusion. Nussbaumer et al.[24] reported that the effects of  
234 endurance exercise on retinal vessel diameters was age- and intensity-dependent. The  
235 findings of our study and previous studies, that physical activity may cause long-term  
236 effects on the choroid, may be dependent on varying disease status.

237

238 As to sedentary behaviour, we found it is not related to CT and other OCT parameters.



239 Anuradha et al. reported that sedentary behaviour quantified by TV viewing time was  
240 significantly associated with the retinal microcirculation in an Australian  
241 population.[25] The Multi-Ethnic Study of Atherosclerosis (MESA) demonstrated  
242 that television viewing time is related to retinal vascular calibre only in non-Hispanic  
243 whites, but not in other ethnic groups.[10] The discrepancy of results in the  
244 aforementioned studies may be related to different definitions of sedentary behaviour  
245 and different ethnicities. The form of sedentary behaviour measured in the two studies  
246 mentioned above was TV viewing and playing computer/video games. This may  
247 cause confounding bias as time spent on electronic screens may affect retinal  
248 microcirculation independently. Consistent with the MESA study, we found no  
249 association of sedentary time with OCT parameters in this Chinese population.

250

251 Sleep deprivation may play a role in the pathogenesis of DR but remains unclear.  
252 Recent studies confirm that obstructive sleep apnoea syndrome (OSAS), characterized  
253 as sleep disturbance, is an independent risk factor for the presence and progression of  
254 DR.[12,14,26,27] Sleep duration has recently been reported to be related to DR risk,  
255 and it has been well documented that CT is changed in DR patients.[28,29] This study  
256 first assessed the relationship between posterior segment structures and sleep duration  
257 in diabetic patients, and found a positive correlation between MCT and sleep duration  
258 in diabetic patients without DR, but no significant association in DR patients. The  
259 relationship between sleep and CT needs further study.

260

261 This study suggests that more physical activity and more sleep are good for the retina  
262 and may reduce the risk of the onset of DR, but the underlying pathogenic  
263 mechanisms to explain these associations remain inconclusive. Hypoxemia,  
264 inflammation, oxidative stress, hormonal changes, insulin resistance, and disturbance  
265 of autoregulation in retinal microcirculation may possibly take part in the  
266 pathogenesis of choroid alteration leading to DR.[5,28,29]

267

268 The major strengths of the present study are: (1) the use of standardized

269 questionnaires, such as the IPAQ and PSQI, to quantify the status of physical activity  
270 and sleep affords well-established reliability and validity of our data; (2) the use of  
271 SS-OCT enabled us to obtain non-invasive ‘optical slices’ of the posterior segment,  
272 including the retina and the choroid; and (3) the comprehensive consideration of  
273 potential confounding factors (age, gender, axial length, duration of diabetes, HbA1c,  
274 BP, cholesterol, BMI, IOP, BCVA, and OCT imaging time). This study also has  
275 certain limitations. First, we only analysed the most representative parameters of  
276 physical activity and sleep in the form of questionnaires, which may have recall bias.  
277 More objective assessment of more complex factors obtained from wearable devices  
278 may be a better method to reduce recall bias in the future.[30] Second, as this study  
279 utilized a cross-sectional design, we cannot infer causality from the observed  
280 associations. Further cohort studies are warranted to verify the findings of the present  
281 study.

282

283 In conclusion, the present study documented a significant relationship between  
284 physical activity, sleep duration, and retino-choroidal structures assessed by SS-OCT  
285 in Chinese patients with type 2 diabetes mellitus. Greater physical activity and longer  
286 sleep duration were correlated with thicker macular choroidal thickness in DR and  
287 NDR patients. Further studies are warranted to clarify the underlying mechanisms and  
288 the role of physical activity and sleep in CT alterations and DR progression.

289

290 **Acknowledgement:**

291 None.

292

293 **Statement of Ethics:**

294 All examinations involving human participants were performed in accordance with  
295 the ethical standards of ZOC ethical committee and the Helsinki declaration and its  
296 later amendments or comparable ethical standards. Informed consent was obtained  
297 from all participants.

298

299 **Disclosure Statement:**

300 The authors have no conflicts of interest to declare.

301

302 **Funding source:**

303 This research was supported in part by the National Natural Science Foundation of  
304 China (81570843; 81530028; 81721003), the Guangdong Province Science &  
305 Technology Plan (2014B020228002).

306

307 **Author contributions:**

308 Design and conduct of the study (WW, YL, WH); Collection, management, analysis  
309 and interpretation of the data (ZQ, WW, YT, MH, LW, YL, WH); Preparation of the  
310 manuscript (ZQ, WW, WH); Review and final approval of the manuscript (all  
311 authors).

312

313

314 **References:**

- 315 1 NCD Risk Factor Collaboration (NCD-RisC): Worldwide trends in diabetes since  
316 1980: A pooled analysis of 751 population-based studies with 4.4 million  
317 participants. *Lancet* 2016;387:1513-1530.
- 318 2 Yau JW, Rogers SL, Kawasaki R, Lamoureux EL, Kowalski JW, Bek T, Chen SJ,  
319 Dekker JM, Fletcher A, Grauslund J, Haffner S, Hamman RF, Ikram MK,  
320 Kayama T, Klein BE, Klein R, Krishnaiah S, Mayurasakorn K, O'Hare JP,  
321 Orchard TJ, Porta M, Rema M, Roy MS, Sharma T, Shaw J, Taylor H, Tielsch  
322 JM, Varma R, Wang JJ, Wang N, West S, Xu L, Yasuda M, Zhang X, Mitchell P,  
323 Wong TY: Global prevalence and major risk factors of diabetic retinopathy.  
324 *Diabetes Care* 2012;35:556-564.
- 325 3 Loprinzi PD, Brodowicz GR, Sengupta S, Solomon SD, Ramulu PY:  
326 Accelerometer-assessed physical activity and diabetic retinopathy in the United  
327 States. *Jama Ophthalmol* 2014;132:1017-1019.
- 328 4 Dirani M, Crowston JG, van Wijngaarden P: Physical inactivity as a risk factor  
329 for diabetic retinopathy? A review. *Clin Exp Ophthalmol* 2014;42:574-581.
- 330 5 Singh SR, Vupparaboina KK, Goud A, Dansingani KK, Chhablani J: Choroidal  
331 imaging biomarkers. *Surv Ophthalmol* 2019;64:312-333.
- 332 6 Dai W, Tham YC, Cheung N, Yasuda M, Tan N, Cheung CY, Wang JJ, Mitchell  
333 P, Sabanayagam C, Wong TY, Cheng CY: Macular thickness profile and diabetic  
334 retinopathy: The Singapore Epidemiology of Eye Diseases Study. *Br J*  
335 *Ophthalmol* 2018;102:1072-1076.
- 336 7 De Clerck E, Schouten J, Berendschot T, Goezinne F, Dagnelie PC, Schaper NC,  
337 Schram MT, Stehouwer C, Webers C: Macular thinning in prediabetes or type 2  
338 diabetes without diabetic retinopathy: The Maastricht Study. *Acta Ophthalmol*  
339 2018;96:174-182.
- 340 8 Tran K, Pakzad-Vaezi K: Multimodal imaging of diabetic retinopathy. *Curr Opin*  
341 *Ophthalmol* 2018;29:566-575.
- 342 9 Gopinath B, Baur LA, Wang JJ, Hardy LL, Teber E, Kifley A, Wong TY,  
343 Mitchell P: Influence of physical activity and screen time on the retinal

- 344 microvasculature in young children. *Arterioscler Thromb Vasc Biol*  
345 2011;31:1233-1239.
- 346 10 Anuradha S, Healy GN, Dunstan DW, Klein R, Klein BE, Cotch MF, Wong TY,  
347 Owen N: Physical activity, television viewing time, and retinal microvascular  
348 caliber: The multi-ethnic study of atherosclerosis. *Am J Epidemiol*  
349 2011;173:518-525.
- 350 11 Tikellis G, Anuradha S, Klein R, Wong TY: Association between physical  
351 activity and retinal microvascular signs: The Atherosclerosis Risk in  
352 Communities (ARIC) Study. *Microcirculation* 2010;17:381-393.
- 353 12 Nishimura A, Kasai T, Kikuno S, Nagasawa K, Okubo M, Narui K, Mori Y:  
354 Apnea hypopnea index during rapid eye movement sleep with diabetic  
355 retinopathy in patients with type 2 diabetes. *J Clin Endocrinol Metab*  
356 2019;104:2075-2082.
- 357 13 Tan N, Chew M, Tham YC, Nguyen QD, Yasuda M, Cheng CY, Wong TY,  
358 Sabanayagam C: Associations between sleep duration, sleep quality and diabetic  
359 retinopathy. *Plos One* 2018;13:e196399.
- 360 14 Jee D, Keum N, Kang S, Arroyo JG: Sleep and diabetic retinopathy. *Acta*  
361 *Ophthalmol* 2017;95:41-47.
- 362 15 Zheng SJ, Orsini N, Ejdervik LB, Wolk A: Long-term physical activity and risk  
363 of age-related cataract: A population-based prospective study of male and  
364 female cohorts. *Ophthalmology* 2015;122:274-280.
- 365 16 Tobaldini E, Fiorelli EM, Solbiati M, Costantino G, Nobili L, Montano N: Short  
366 sleep duration and cardiometabolic risk: From pathophysiology to clinical  
367 evidence. *Nat Rev Cardiol* 2019;16:213-224.
- 368 17 Alnawaiseh M, Lahme L, Treder M, Rosentreter A, Eter N: Short-term effects of  
369 exercise on optic nerve and macular perfusion measured by optical coherence  
370 tomography angiography. *Retina* 2017;37:1642-1646.
- 371 18 Alwassia AA, Adhi M, Zhang JY, Regatieri CV, Al-Quthami A, Salem D,  
372 Fujimoto JG, Duker JS: Exercise-induced acute changes in systolic blood  
373 pressure do not alter choroidal thickness as measured by a portable

- 374 spectral-domain optical coherence tomography device. *Retina*  
375 2013;33:160-165.
- 376 19 Lundberg K, Vestergaard AH, Jacobsen N, Suhr TA, Sogaard HR, Goldschmidt  
377 E, Peto T, Halekoh U, Wedderkopp N, Grauslund J: Choroidal thickness and  
378 myopia in relation to physical activity - the CHAMPS Eye Study. *Acta*  
379 *Ophthalmol* 2018
- 380 20 Saarela V, Ahvenvaara E, Tuulonen A: Variability of Heidelberg Retina  
381 Tomograph parameters during exercise. *Acta Ophthalmol* 2013;91:32-36.
- 382 21 Keel S, Itsiopoulos C, Koklanis K, Vukicevic M, Cameron F, Brazionis L:  
383 Physical activity, sedentary behaviors, and retinal vascular caliber in children  
384 and adolescents with type 1 diabetes. *Asia Pac J Ophthalmol (Phila)*  
385 2016;5:180-184.
- 386 22 Sayin N, Kara N, Pekel G, Altinkaynak H: Choroidal thickness changes after  
387 dynamic exercise as measured by spectral-domain optical coherence tomography.  
388 *Indian J Ophthalmol* 2015;63:445-450.
- 389 23 Hong J, Zhang H, Kuo DS, Wang H, Huo Y, Yang D, Wang N: The short-term  
390 effects of exercise on intraocular pressure, choroidal thickness and axial length.  
391 *Plos One* 2014;9:e104294.
- 392 24 Nussbaumer M, Donath L, Fischer M, Schafer J, Faude O, Zahner L,  
393 Schmidt-Trucksass A, Hanssen H: Effects of acute bouts of endurance exercise  
394 on retinal vessel diameters are age and intensity dependent. *Age (Dordr)*  
395 2014;36:9650.
- 396 25 Anuradha S, Dunstan DW, Healy GN, Shaw JE, Zimmet PZ, Wong TY, Owen N:  
397 Physical activity, television viewing time, and retinal vascular caliber. *Med Sci*  
398 *Sports Exerc* 2011;43:280-286.
- 399 26 Altaf QA, Dodson P, Ali A, Raymond NT, Wharton H, Fellows H,  
400 Hampshire-Bancroft R, Shah M, Shepherd E, Miah J, Barnett AH, Tahrani AA:  
401 Obstructive sleep apnea and retinopathy in patients with type 2 diabetes. A  
402 longitudinal study. *Am J Respir Crit Care Med* 2017;196:892-900.
- 403 27 Zhang R, Zhang P, Zhao F, Han X, Ji L: Association of diabetic microvascular

- 404 complications and parameters of obstructive sleep apnea in patients with type 2  
405 diabetes. *Diabetes Technol Ther* 2016;18:415-420.
- 406 28 Campos A, Campos EJ, Martins J, Ambrosio AF, Silva R: Viewing the choroid:  
407 Where we stand, challenges and contradictions in diabetic retinopathy and  
408 diabetic macular oedema. *Acta Ophthalmol* 2017;95:446-459.
- 409 29 Melancia D, Vicente A, Cunha JP, Abegao PL, Ferreira J: Diabetic choroidopathy:  
410 A review of the current literature. *Graefes Arch Clin Exp Ophthalmol*  
411 2016;254:1453-1461.
- 412 30 Lee MJ, Wang J, Friedman DS, Boland MV, De Moraes CG, Ramulu PY:  
413 Greater physical activity is associated with slower visual field loss in glaucoma.  
414 *Ophthalmology* 2018  
415

416 **Table legends**

417 **Table 1.** Demographic and clinical characteristics of included diabetic patients.

| Characteristics               | All           | Diabetic retinopathy | Non diabetic retinopathy | P-value |
|-------------------------------|---------------|----------------------|--------------------------|---------|
| No. of subjects               | 232           | 116                  | 116                      | -       |
| Female, %                     | 123(53.02%)   | 63(54.31%)           | 60(51.72%)               | 0.693   |
| Age, year                     | 64.2±7.2      | 64.1±7.3             | 64.2±7.1                 | 0.935   |
| Duration of diabetes, year    | 11.7±7.0      | 11.7±7.5             | 11.7±6.5                 | 0.996   |
| HbA1c, %                      | 7.3±1.6       | 7.5±1.8              | 7.1±1.3                  | 0.062   |
| Height, cm                    | 160.2±9.0     | 160.5±8.6            | 159.8±9.4                | 0.548   |
| Weight, kg                    | 62.6±11.2     | 63.7±11.8            | 61.4±10.5                | 0.134   |
| Mean blood pressure, mmHg     | 180.1±22.5    | 182.9±24.3           | 177.3±20.3               | 0.060   |
| Total cholesterol, mmol/L     | 5.0±1.1       | 4.9±1.0              | 5.0±1.2                  | 0.516   |
| Serum creatinine, μmol/L      | 76.2±25.5     | 78.3±28.6            | 74.0±21.8                | 0.199   |
| Triglycerides, mmol/L         | 2.3±1.7       | 2.3±1.6              | 2.2±1.8                  | 0.757   |
| Serum uric acid, μmol/L       | 366.0±109.5   | 353.4±101.8          | 378.6±115.8              | 0.080   |
| C-reactive protein, mg/L      | 2.7±4.5       | 2.9±4.6              | 2.5±4.4                  | 0.585   |
| BCVA, logMAR                  | 0.2±0.1       | 0.2±0.1              | 0.2±0.2                  | 0.788   |
| Intraocular pressure, mmHg    | 16.0±2.6      | 16.3±2.7             | 15.8±2.5                 | 0.099   |
| Central corneal thickness, μm | 548.1±32.6    | 549.2±33.8           | 547.0±31.5               | 0.611   |
| Axial length, mm              | 23.4±1.1      | 23.4±1.0             | 23.4±1.1                 | 0.809   |
| Anterior chamber depth, mm    | 2.4±0.4       | 2.4±0.5              | 2.4±0.4                  | 0.611   |
| MET, kcal/kg·h                | 2391.4±1331.9 | 2460.8±1366.9        | 2321.9±1298.1            | 0.428   |
| Sitting time, minute/d        | 357.3±125.9   | 345.8±124.4          | 368.8±126.8              | 0.164   |
| Sleep duration, hour/d        | 6.1±1.3       | 6.1±1.2              | 6.1±1.4                  | 0.956   |

418 Mean blood pressure=Diastolic blood pressure+1/3\*(Systolic blood pressure -Diastolic blood pressure); BCVA=best-corrected visual acuity;

419 MET=metabolic equivalents (kilocalories per kilograms per hour)



420

421

**Table 2.** Relationship between physical activity and OCT parameters in both groups.

| MET, per 100-kilocalories/kg·h increase  | Non diabetic retinopathy group |         | Diabetic retinopathy group |              |
|------------------------------------------|--------------------------------|---------|----------------------------|--------------|
|                                          | Beta (95%CI)                   | P-value | Beta (95%CI)               | P-value      |
| <b>Model 1*</b>                          |                                |         |                            |              |
| Average mRNFL thickness, $\mu\text{m}$   | -0.008(-0.04, 0.025)           | 0.646   | 0.015(-0.031, 0.06)        | 0.533        |
| Average GC-IPL thickness, $\mu\text{m}$  | 0.016(-0.065, 0.097)           | 0.702   | 0.033(-0.045, 0.11)        | 0.407        |
| Average retinal thickness, $\mu\text{m}$ | 0.067(-0.111, 0.245)           | 0.456   | 0.122(-0.074, 0.318)       | 0.219        |
| Average MCT, $\mu\text{m}$               | -0.078(-1.271, 1.115)          | 0.898   | 1.561(0.653, 2.469)        | <b>0.001</b> |
| Average pRNFL thickness, $\mu\text{m}$   | 0.004(-0.182, 0.19)            | 0.963   | 0.077(-0.106, 0.26)        | 0.408        |
| Average pCT, $\mu\text{m}$               | -0.44(-1.249, 0.369)           | 0.284   | 0.628(-0.084, 1.34)        | 0.083        |
| <b>Model 2†</b>                          |                                |         |                            |              |
| Average mRNFL thickness, $\mu\text{m}$   | -0.009(-0.041, 0.024)          | 0.602   | 0.009(-0.038, 0.056)       | 0.696        |
| Average GC-IPL thickness, $\mu\text{m}$  | 0.011(-0.069, 0.092)           | 0.780   | 0.029(-0.051, 0.108)       | 0.478        |
| Average retinal thickness, $\mu\text{m}$ | 0.064(-0.105, 0.233)           | 0.455   | 0.102(-0.095, 0.298)       | 0.307        |
| Average MCT, $\mu\text{m}$               | -0.14(-1.243, 0.963)           | 0.802   | 1.267(0.388, 2.146)        | <b>0.005</b> |
| Average pRNFL thickness, $\mu\text{m}$   | -0.008(-0.189, 0.173)          | 0.930   | 0.068(-0.115, 0.251)       | 0.461        |
| Average pCT, $\mu\text{m}$               | -0.524(-1.27, 0.221)           | 0.166   | 0.316(-0.355, 0.986)       | 0.352        |
| <b>Model 3‡</b>                          |                                |         |                            |              |
| Average mRNFL thickness, $\mu\text{m}$   | -0.013(-0.046, 0.02)           | 0.432   | 0.017(-0.03, 0.063)        | 0.484        |
| Average GC-IPL thickness, $\mu\text{m}$  | 0.004(-0.078, 0.087)           | 0.918   | 0.037(-0.048, 0.122)       | 0.385        |
| Average retinal thickness, $\mu\text{m}$ | 0.061(-0.115, 0.237)           | 0.491   | 0.11(-0.092, 0.313)        | 0.283        |
| Average MCT, $\mu\text{m}$               | 0.321(-0.643, 1.284)           | 0.511   | 1.163(0.347, 1.978)        | <b>0.006</b> |
| Average pRNFL thickness, $\mu\text{m}$   | -0.4(-1.177, 0.377)            | 0.310   | 0.32(-0.367, 1.007)        | 0.357        |
| Average pCT, $\mu\text{m}$               | -0.025(-0.206, 0.155)          | 0.781   | 0.128(-0.05, 0.307)        | 0.156        |

422 OCT=optical coherence tomography; mRNFL=macular retinal nerve fiber layer; GC-IPL=ganglion cell-inner plexiform layer; MCT=macular  
 423 choroidal thickness; pRNFL=peripapillary retinal nerve fiber layer; pCT= peripapillary choroidal thickness; MET=metabolic equivalents  
 424 (kilocalories per kilograms per hour).

425 \*Model 1: univariable linear regression.

426 †Model 2: adjusted for age and sex.

427 ‡Model 3: further adjusted for axial length, duration, HbA1c, mean blood pressure, cholesterol, body mass index (BMI), intraocular pressure  
 428 (IOP), best-corrected visual acuity (BCVA, logMAR unit), OCT imaging time.

429 Bold indicates statistically significant.

430

431 **Table 3.** Relationship between sitting time and OCT parameters in both groups.

| Sitting time, per 100-minutes increase   | Non diabetic retinopathy group |         | Diabetic retinopathy group |         |
|------------------------------------------|--------------------------------|---------|----------------------------|---------|
|                                          | Beta (95%CI)                   | P-value | Beta (95%CI)               | P-value |
| <b>Model 1*</b>                          |                                |         |                            |         |
| Average mRNFL thickness, $\mu\text{m}$   | 0.248 (-0.078,0.575)           | 0.135   | -0.052 (-0.556, 0.452)     | 0.838   |
| Average GC-IPL thickness, $\mu\text{m}$  | -0.331 (-1.150,0.489)          | 0.425   | -0.142 (-0.997, 0.713)     | 0.743   |
| Average retinal thickness, $\mu\text{m}$ | 0.909 (-0.904,2.722)           | 0.323   | -0.694 (-2.859, 1.471)     | 0.527   |
| Average MCT, $\mu\text{m}$               | 7.191 (-4.946,19.328)          | 0.243   | 1.199 (-9.267, 11.665)     | 0.821   |
| Average pRNFL thickness, $\mu\text{m}$   | 0.659 (-1.236,2.554)           | 0.492   | -0.160 (-2.226, 1.906)     | 0.878   |
| Average pCT, $\mu\text{m}$               | 3.907 (-4.360,12.174)          | 0.351   | -5.852 (-13.575, 1.872)    | 0.136   |
| <b>Model 2†</b>                          |                                |         |                            |         |
| Average mRNFL thickness, $\mu\text{m}$   | 0.236 (-0.101,0.573)           | 0.168   | -0.043 (-0.572, 0.487)     | 0.874   |
| Average GC-IPL thickness, $\mu\text{m}$  | -0.336 (-1.172,0.500)          | 0.428   | -0.138 (-1.041, 0.765)     | 0.762   |
| Average retinal thickness, $\mu\text{m}$ | 0.165 (-1.612,1.941)           | 0.855   | -1.523 (-3.737, 0.690)     | 0.175   |
| Average MCT, $\mu\text{m}$               | 2.005 (-9.579,13.588)          | 0.732   | -0.181 (-10.487, 10.125)   | 0.972   |
| Average pRNFL thickness, $\mu\text{m}$   | 0.375 (-1.515,2.265)           | 0.695   | 0.667 (-1.449, 2.783)      | 0.533   |
| Average pCT, $\mu\text{m}$               | 0.666 (-7.195,8.527)           | 0.867   | -5.799 (-13.205, 1.607)    | 0.124   |
| <b>Model 3‡</b>                          |                                |         |                            |         |
| Average mRNFL thickness, $\mu\text{m}$   | 0.262 (-0.095,0.619)           | 0.148   | 0.084 (-0.488, 0.655)      | 0.772   |
| Average GC-IPL thickness, $\mu\text{m}$  | -0.404 (-1.313,0.505)          | 0.380   | -0.558 (-1.599, 0.483)     | 0.290   |
| Average retinal thickness, $\mu\text{m}$ | -0.002 (-1.985,1.980)          | 0.998   | -1.953 (-4.420, 0.515)     | 0.120   |
| Average MCT, $\mu\text{m}$               | -4.153 (-14.976,6.669)         | 0.448   | -5.970 (-16.317, 4.376)    | 0.255   |
| Average pRNFL thickness, $\mu\text{m}$   | -1.272 (-9.920,7.376)          | 0.771   | -5.926 (-14.183, 2.330)    | 0.157   |
| Average pCT, $\mu\text{m}$               | 0.040 (-1.961,2.040)           | 0.969   | 0.656 (-1.598, 2.909)      | 0.565   |

432 OCT=optical coherence tomography; mRNFL=macular retinal nerve fiber layer; GC-IPL=ganglion cell-inner plexiform layer; MCT=macular  
 433 choroidal thickness; pRNFL=peripapillary retinal nerve fiber layer; pCT= peripapillary choroidal thickness; MET=metabolic equivalents  
 434 (kilocalories per kilograms per hour).

435 \*Model 1: univariable linear regression.

436 †Model 2: adjusted for age and sex.

437 ‡Model 3: further adjusted for axial length, duration, HbA1c, mean blood pressure, cholesterol, body mass index (BMI), intraocular pressure  
 438 (IOP), best-corrected visual acuity (BCVA, logMAR unit), OCT imaging time.

439 **Table 4.** Relationship between sleep duration and OCT parameters in both groups.

| Sleep duration, per 1-hour increase      | Non diabetic retinopathy group |              | Diabetic retinopathy group |         |
|------------------------------------------|--------------------------------|--------------|----------------------------|---------|
|                                          | Beta (95%CI)                   | P-value      | Beta (95%CI)               | P-value |
| <b>Model 1*</b>                          |                                |              |                            |         |
| Average mRNFL thickness, $\mu\text{m}$   | 0.092 (-0.228, 0.412)          | 0.568        | -0.432 (-0.958, 0.094)     | 0.106   |
| Average GC-IPL thickness, $\mu\text{m}$  | -0.362 (-1.155, 0.432)         | 0.368        | -0.221 (-1.117, 0.674)     | 0.625   |
| Average retinal thickness, $\mu\text{m}$ | 1.282 (-0.471, 3.035)          | 0.150        | -1.139 (-3.413, 1.135)     | 0.323   |
| Average MCT, $\mu\text{m}$               | 16.020 (4.758, 27.282)         | <b>0.006</b> | -3.915 (-15.360, 7.530)    | 0.499   |
| Average pRNFL thickness, $\mu\text{m}$   | 0.983 (-0.915, 2.880)          | 0.307        | -0.732 (-2.904, 1.439)     | 0.505   |
| Average pCT, $\mu\text{m}$               | 6.174 (-1.688, 14.035)         | 0.122        | -0.740 (-8.998, 7.519)     | 0.859   |
| <b>Model 2†</b>                          |                                |              |                            |         |
| Average mRNFL thickness, $\mu\text{m}$   | 0.071 (-0.264, 0.407)          | 0.674        | -0.398 (-0.926, 0.131)     | 0.138   |
| Average GC-IPL thickness, $\mu\text{m}$  | -0.351 (-1.173, 0.472)         | 0.399        | -0.192 (-1.098, 0.714)     | 0.675   |
| Average retinal thickness, $\mu\text{m}$ | 0.462 (-1.288, 2.212)          | 0.602        | -1.130 (-3.378, 1.117)     | 0.321   |
| Average MCT, $\mu\text{m}$               | 11.110 (0.031, 22.188)         | <b>0.049</b> | -2.611 (-13.491, 8.269)    | 0.635   |
| Average pRNFL thickness, $\mu\text{m}$   | 0.938 (-0.934, 2.811)          | 0.323        | -0.534 (-2.668, 1.601)     | 0.621   |
| Average pCT, $\mu\text{m}$               | 3.134 (-4.357, 10.624)         | 0.409        | 1.506 (-6.096, 9.108)      | 0.695   |
| <b>Model 3‡</b>                          |                                |              |                            |         |
| Average mRNFL thickness, $\mu\text{m}$   | -0.031 (-0.363, 0.301)         | 0.853        | -0.324 (-0.886, 0.237)     | 0.254   |
| Average GC-IPL thickness, $\mu\text{m}$  | -0.313 (-1.153, 0.526)         | 0.461        | -0.286 (-1.318, 0.746)     | 0.583   |
| Average retinal thickness, $\mu\text{m}$ | 0.558 (-1.267, 2.384)          | 0.545        | -0.548 (-3.029, 1.933)     | 0.662   |
| Average MCT, $\mu\text{m}$               | 10.541 (0.962, 20.121)         | <b>0.031</b> | -6.774 (-17.643, 4.094)    | 0.219   |
| Average pRNFL thickness, $\mu\text{m}$   | 1.106 (-0.695, 2.908)          | 0.226        | -0.181 (-2.436, 2.075)     | 0.874   |
| Average pCT, $\mu\text{m}$               | 2.379 (-5.410, 10.167)         | 0.546        | 2.136 (-6.060, 10.333)     | 0.605   |

440 OCT=optical coherence tomography; mRNFL=macular retinal nerve fiber layer; GC-IPL=ganglion cell-inner plexiform layer; MCT=macular  
 441 choroidal thickness; pRNFL=peripapillary retinal nerve fiber layer; pCT= peripapillary choroidal thickness; MET=metabolic equivalents  
 442 (kilocalories per kilograms per hour).

443 \*Model 1: univariable linear regression.

444 †Model 2: adjusted for age and sex.

445 ‡Model 3: further adjusted for axial length, duration, HbA1c, mean blood pressure, cholesterol, body mass index (BMI), intraocular pressure  
 446 (IOP), best-corrected visual acuity (BCVA, logMAR unit), OCT imaging time.

447 Bold indicates statistically significant.

448

449 **Figure legends**

450 **Figure 1.** Choroidal thickness in macular region stratified by MET tertile in patients

451 without retinopathy.

452 **Figure 2.** Choroidal thickness in macular region stratified by sleep duration in

453 patients with retinopathy.

454

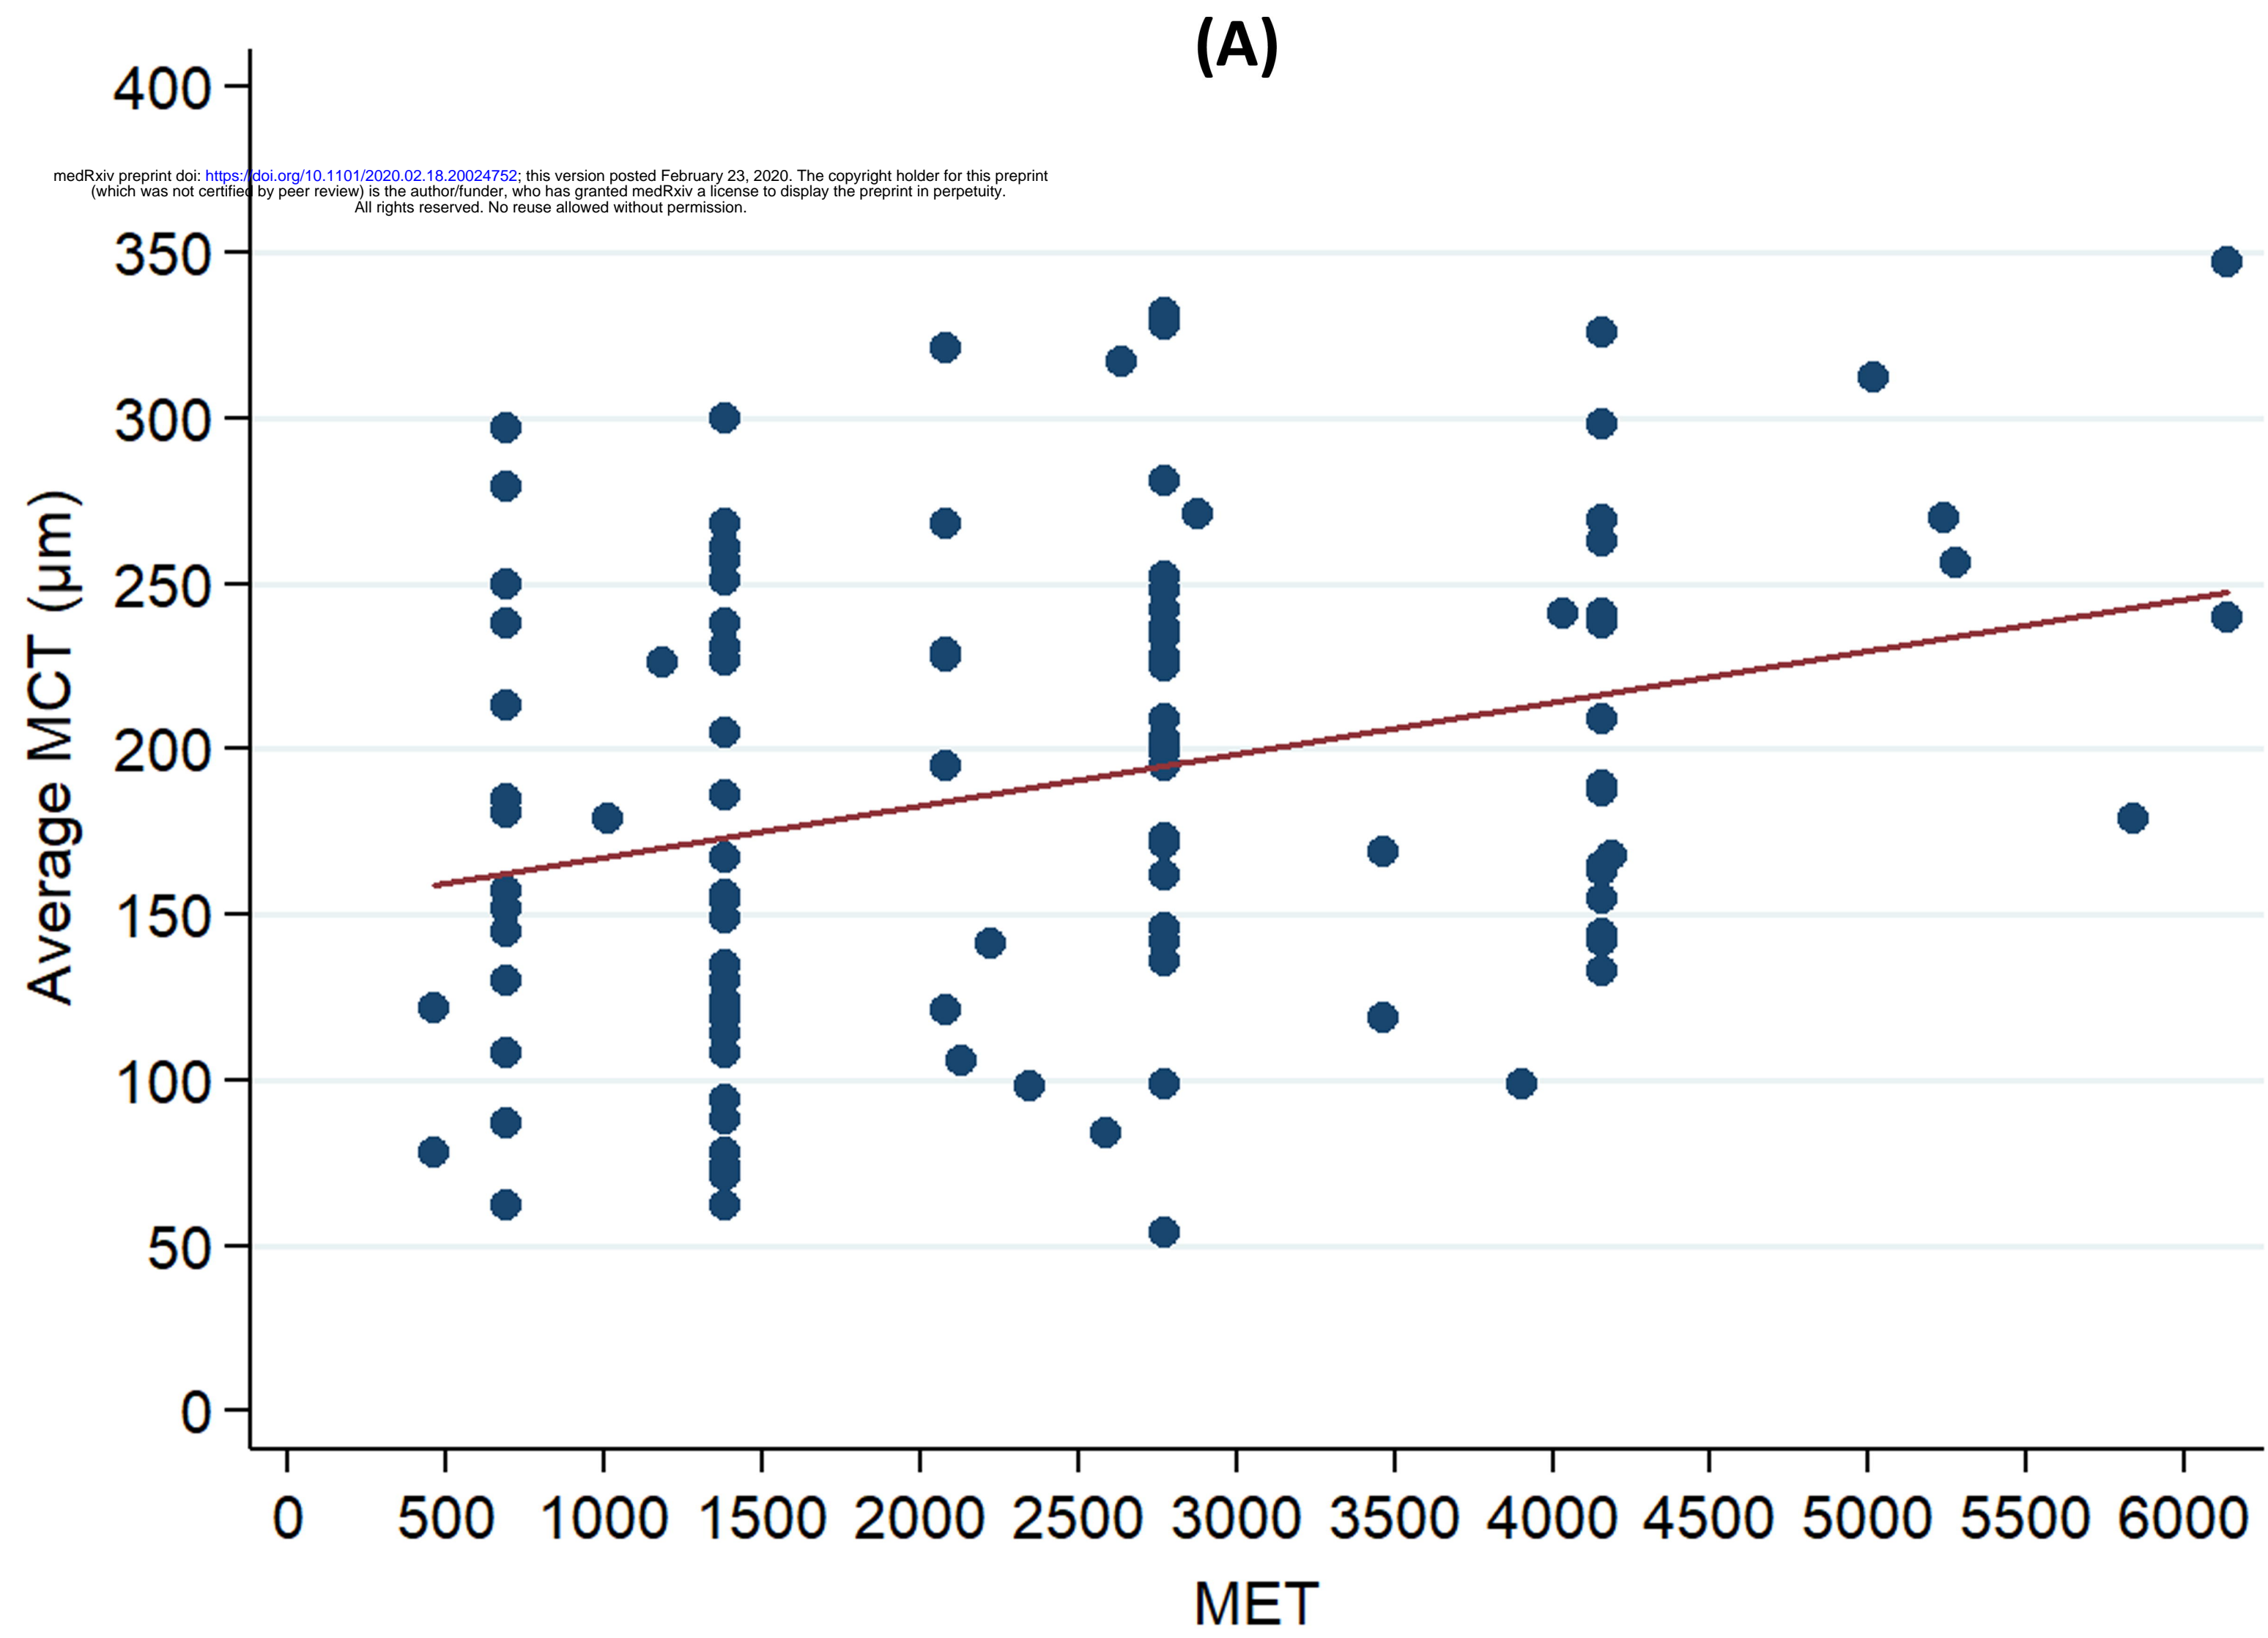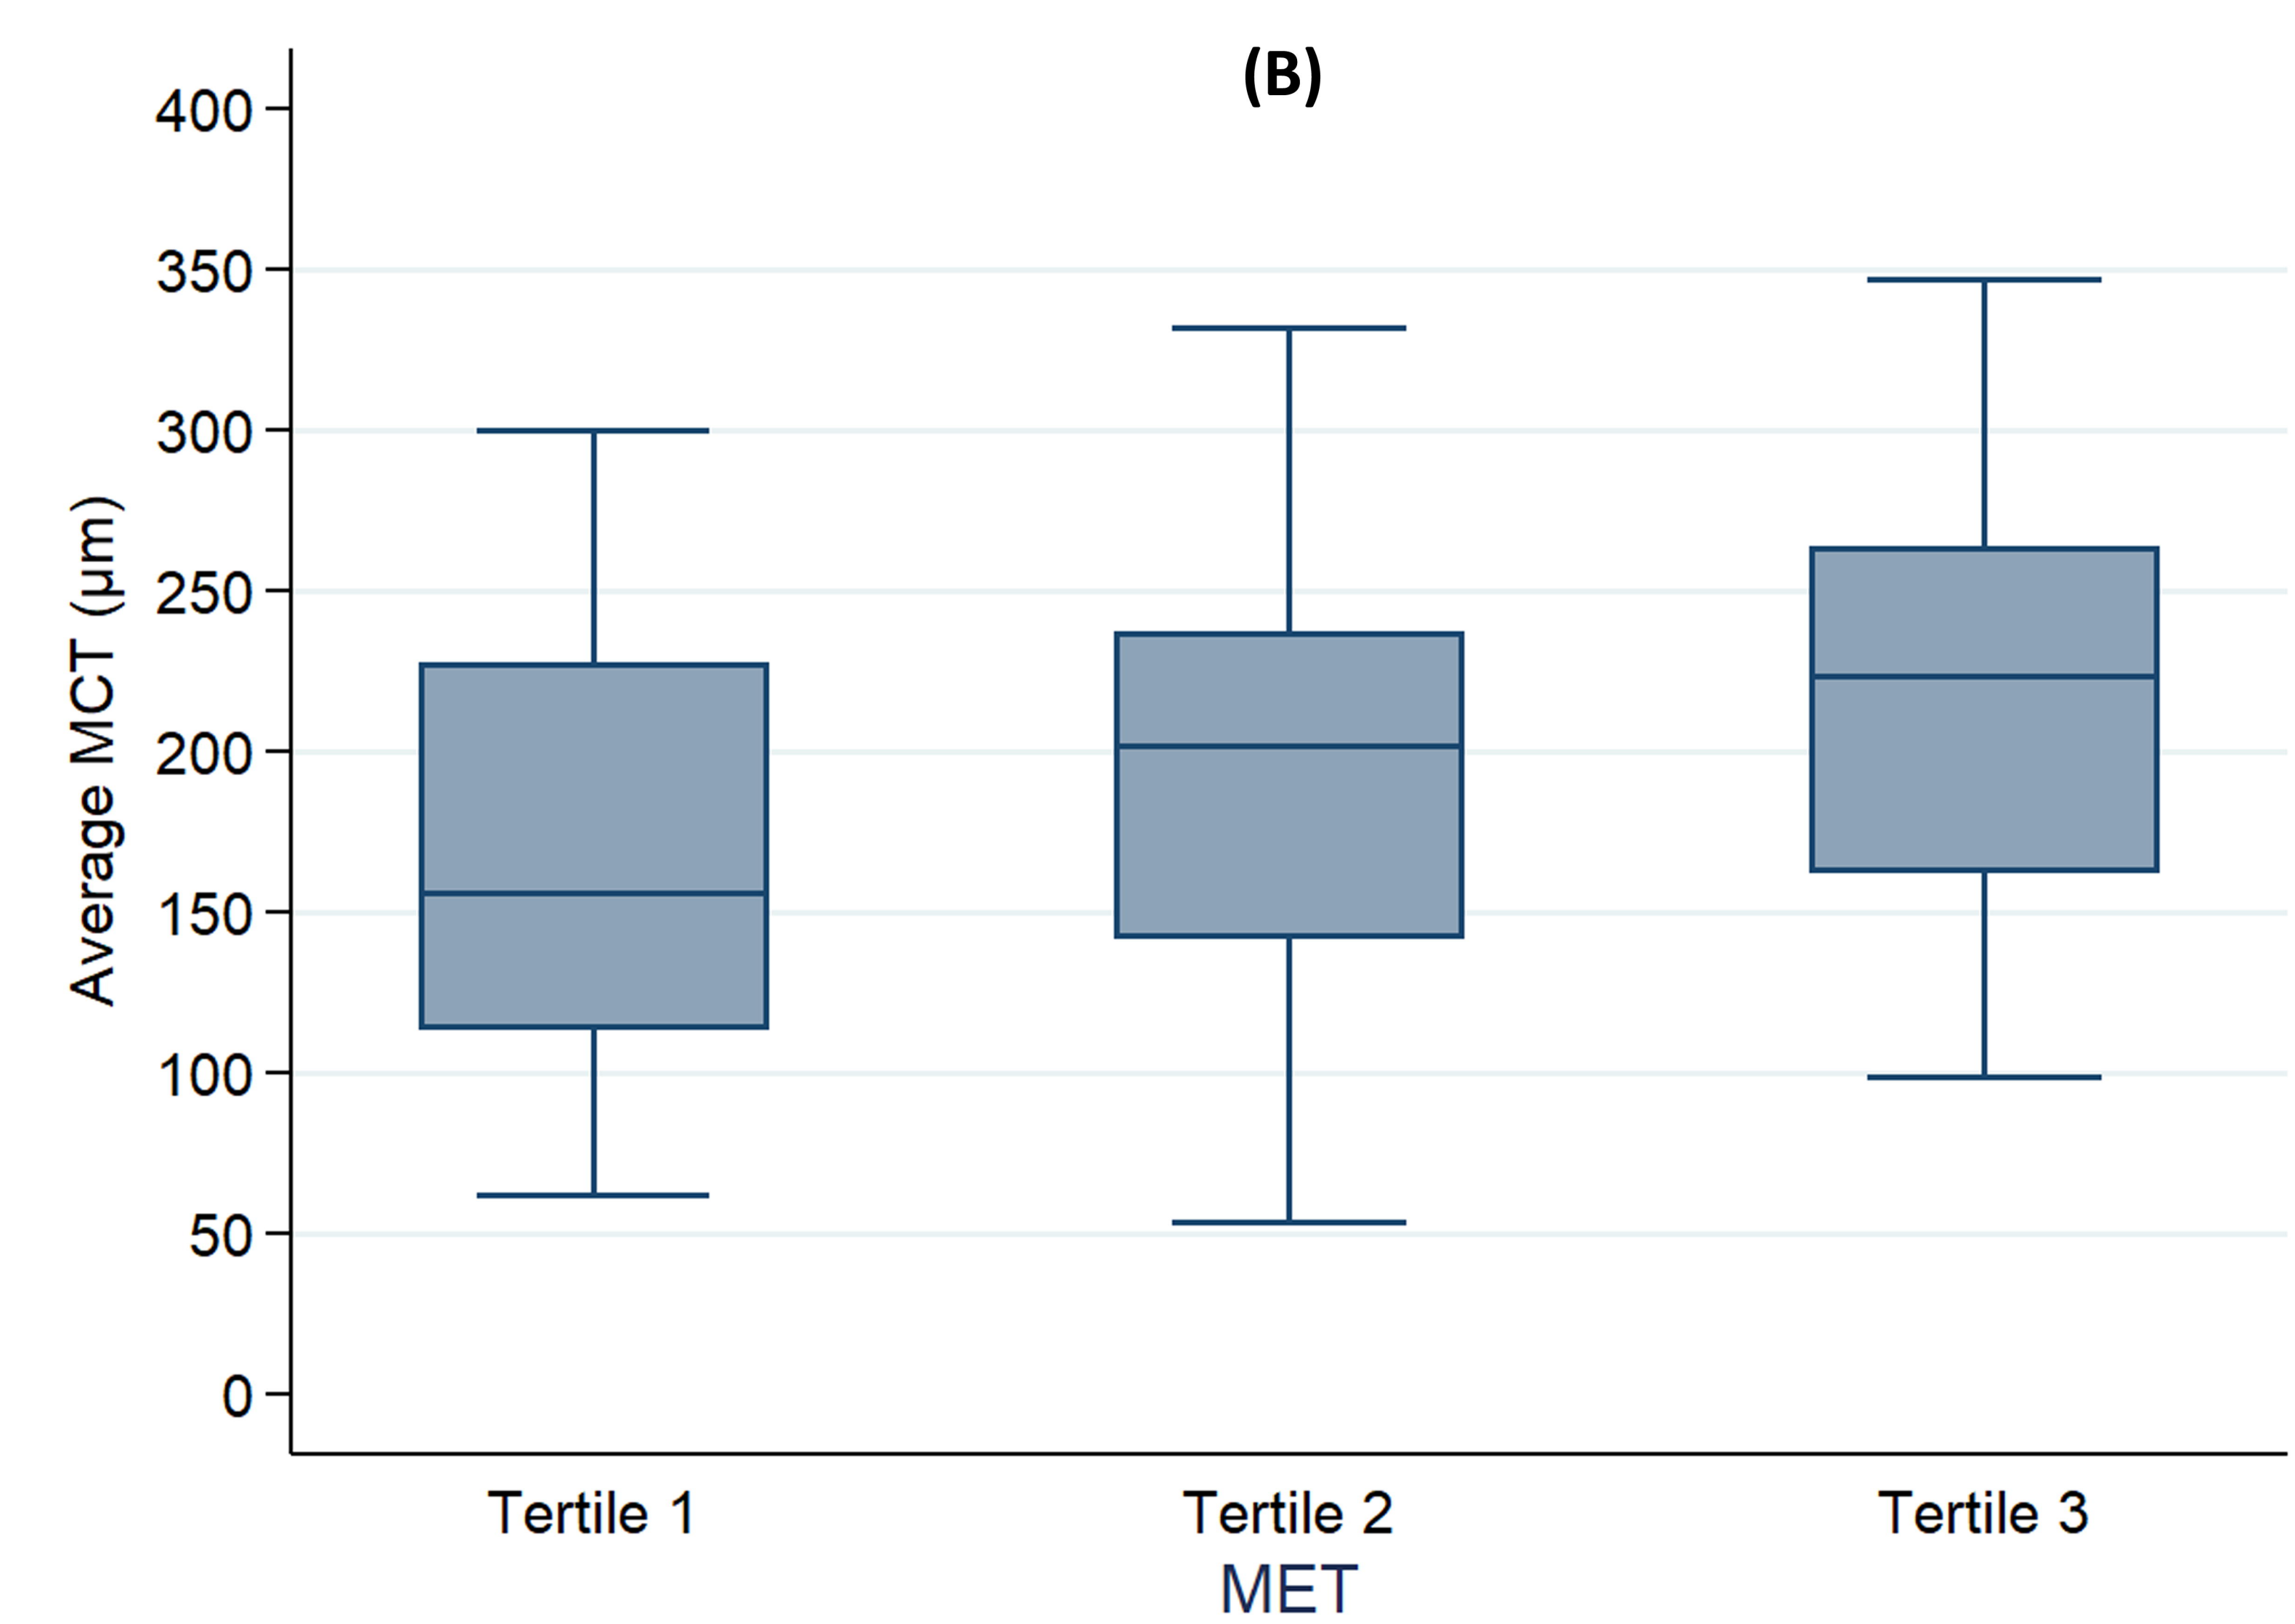

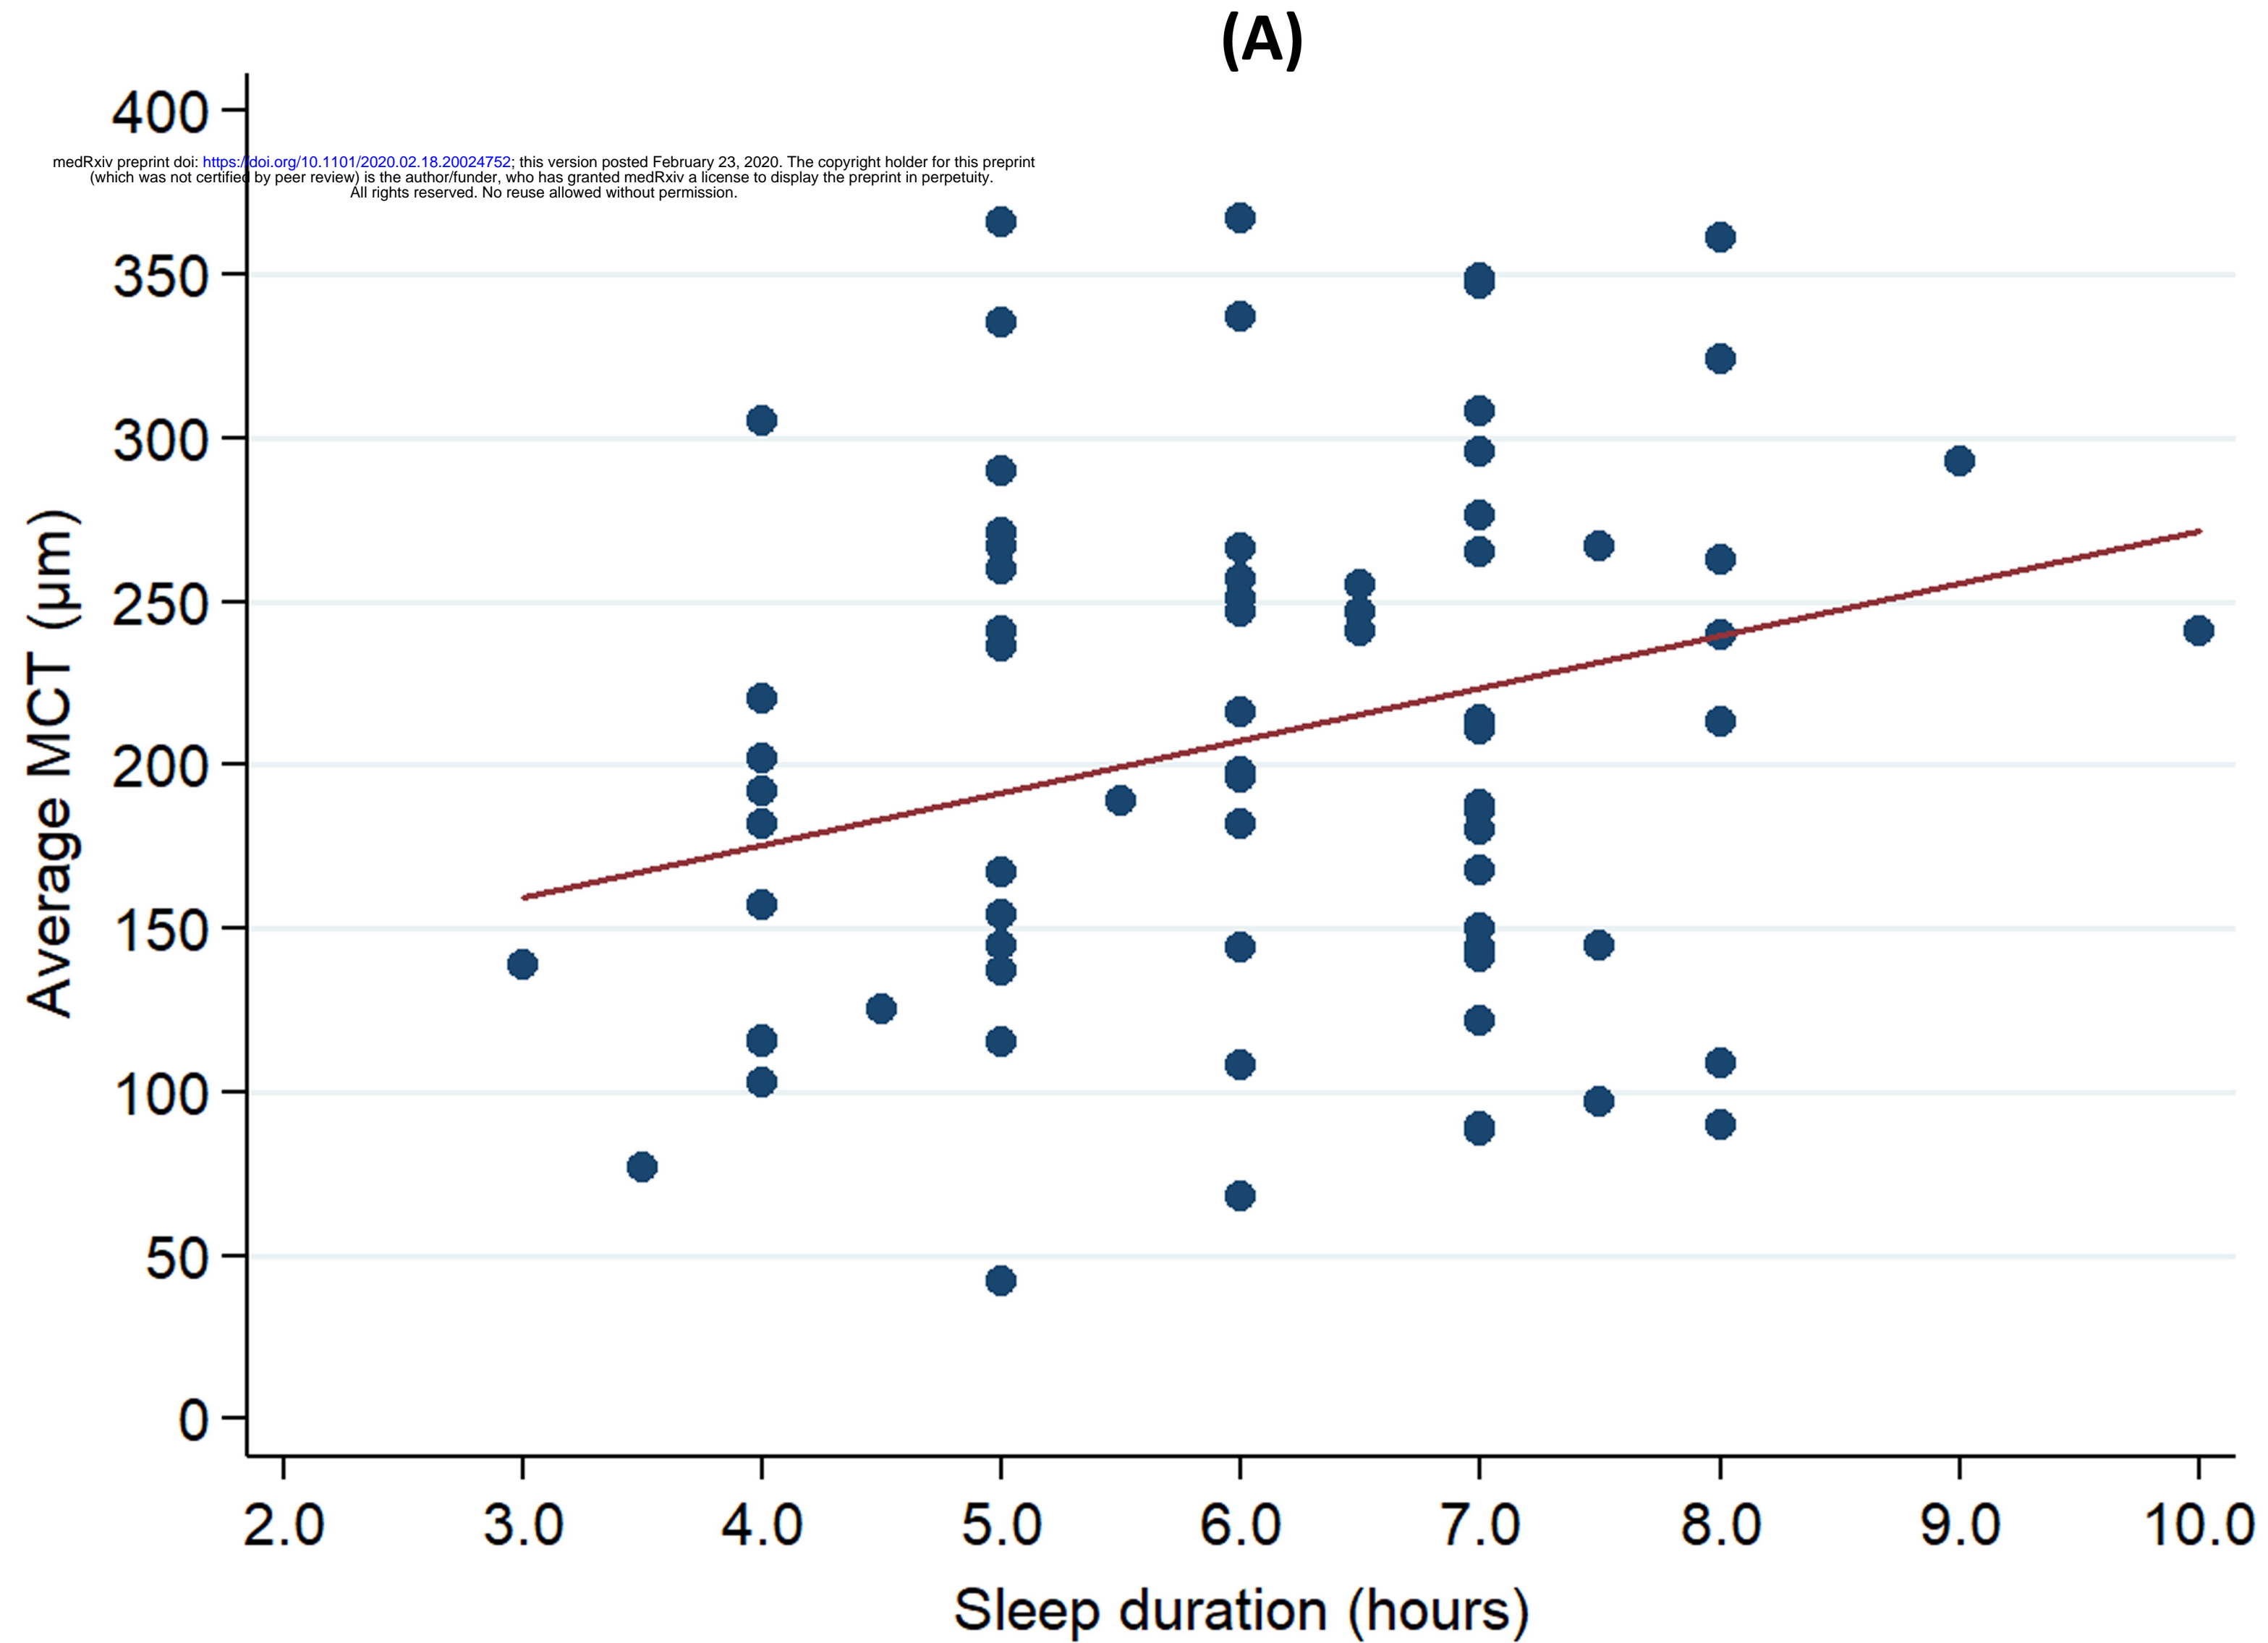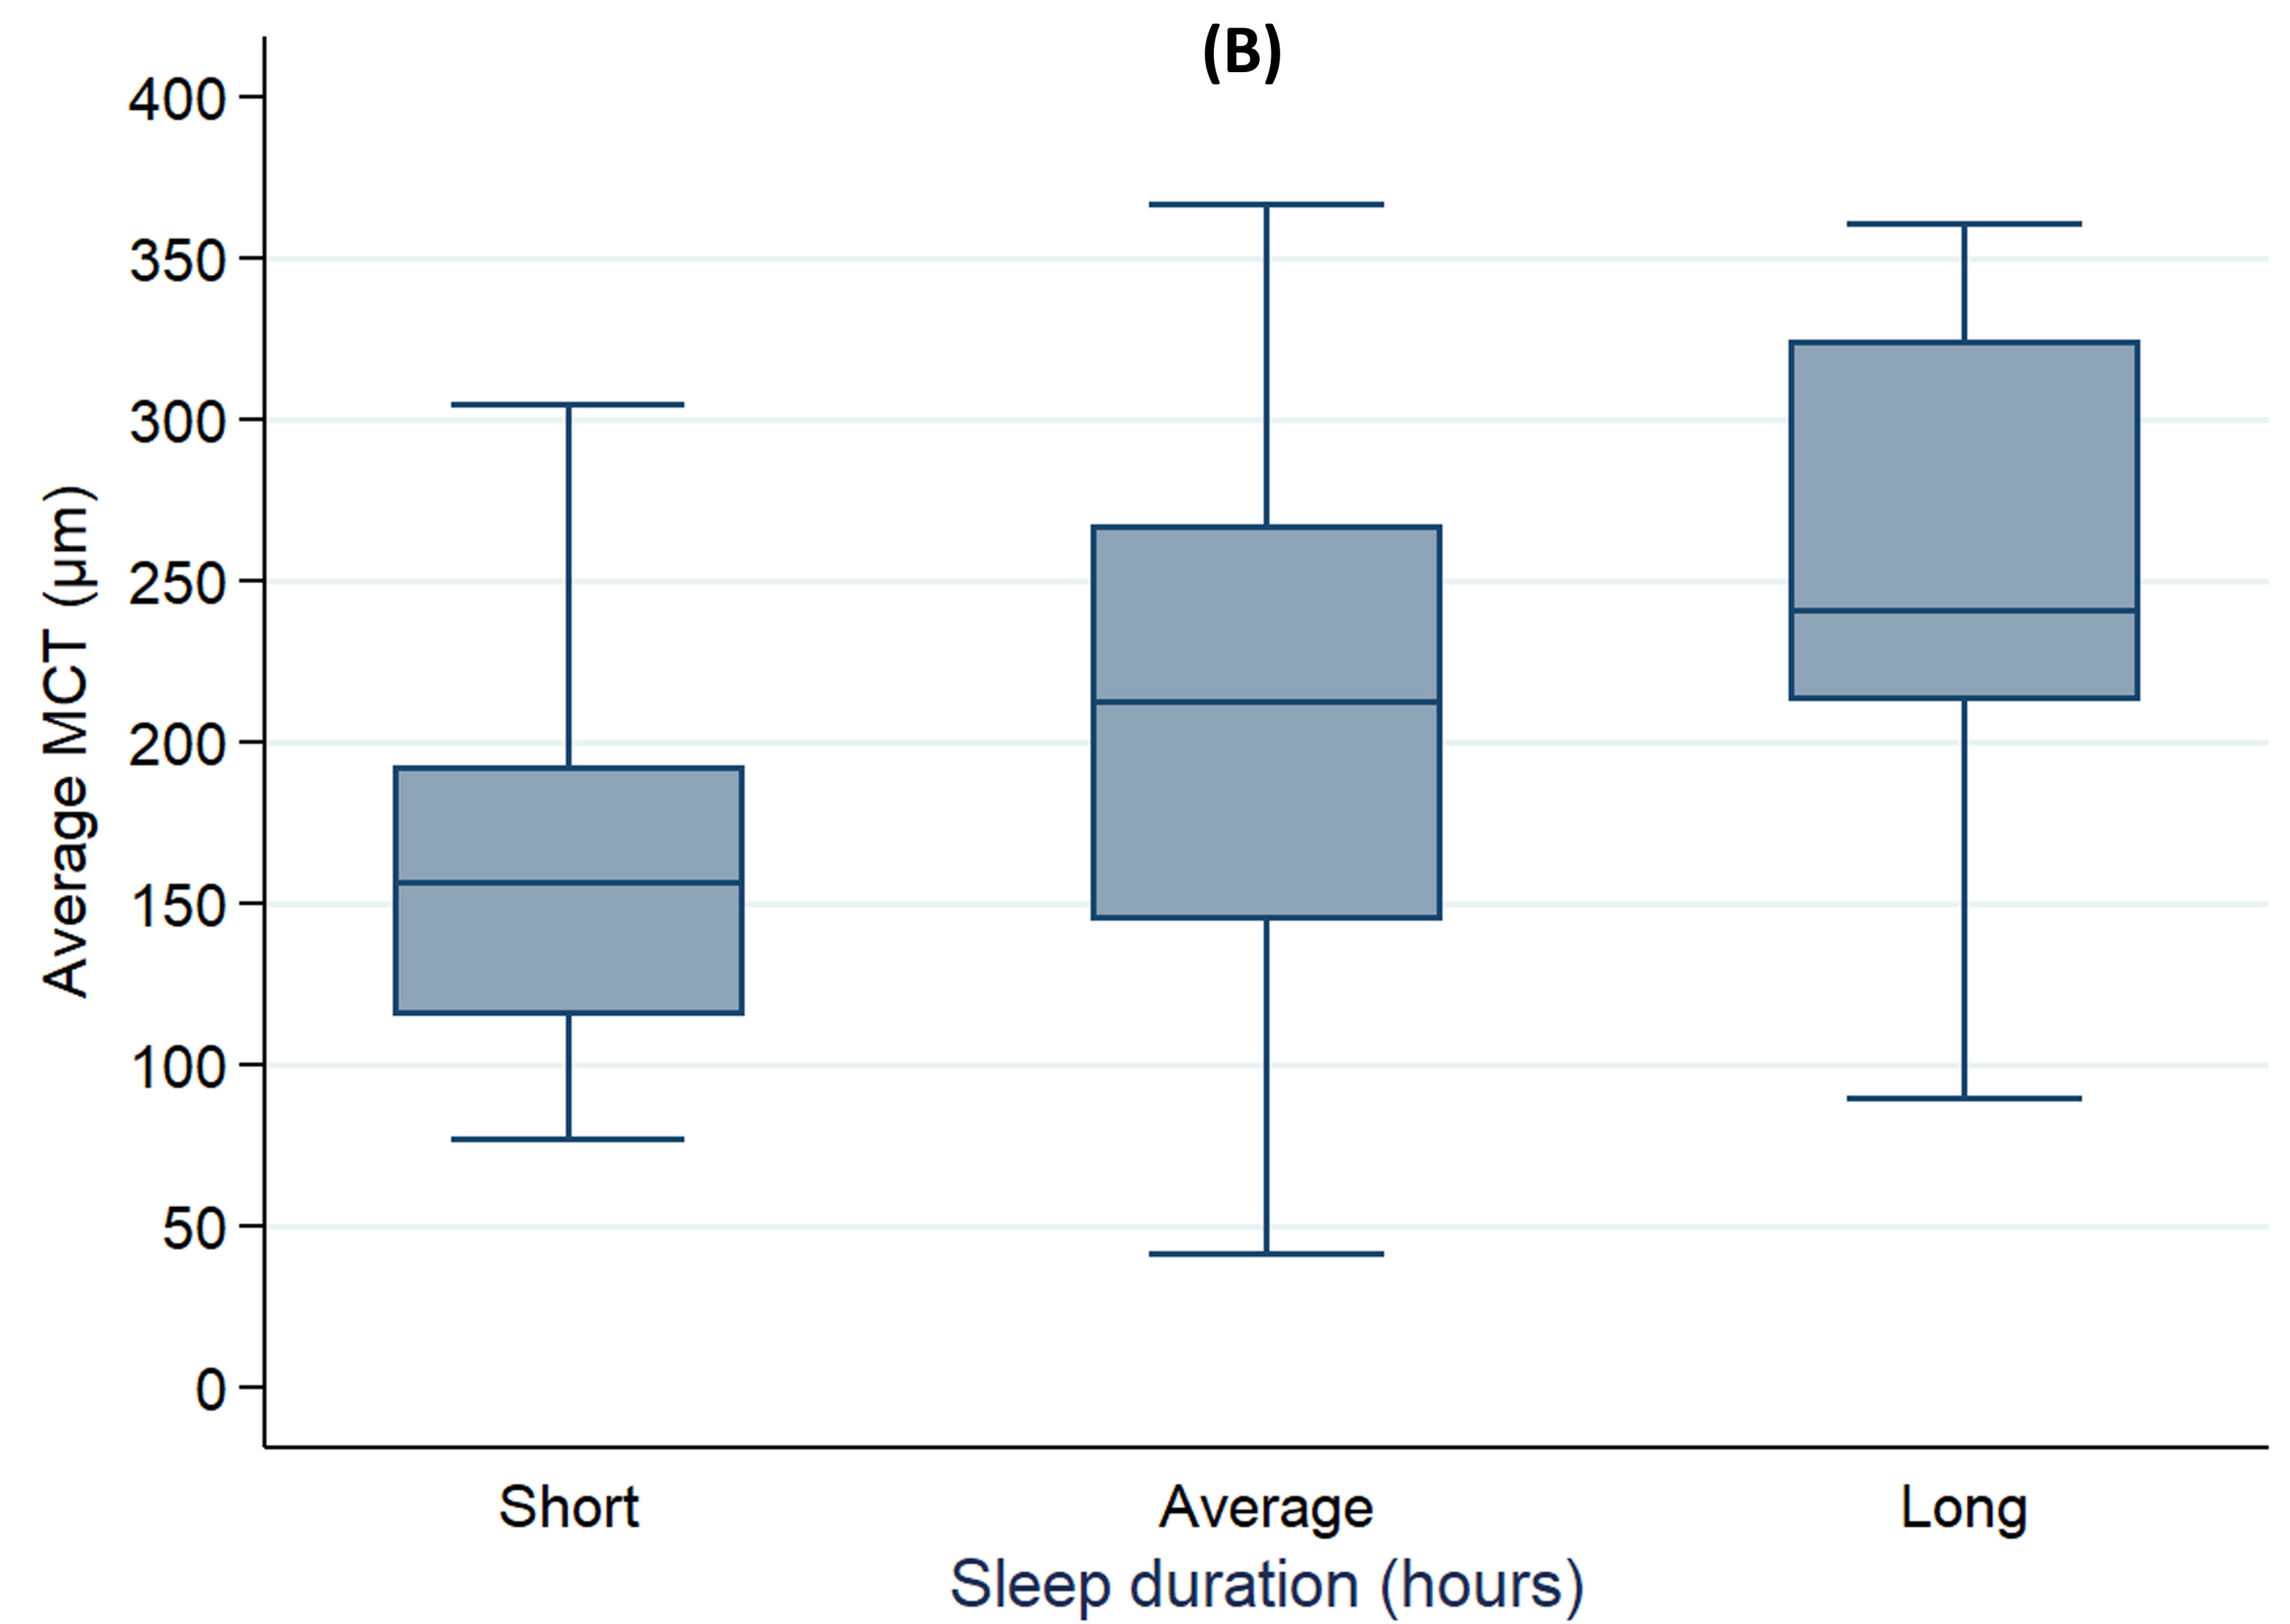

Source: https://www.medrxiv.org/content/10.1101/2020.02.18.20024752v1.full.pdf
